# Supplementary material
Source: PubMed Central journal article supplement (PMC3264302)
Supplement: supp_80.2.839_IAI5497-11_SF1.pdf [file supp_80.2.839_IAI5497-11_SF1.pdf]

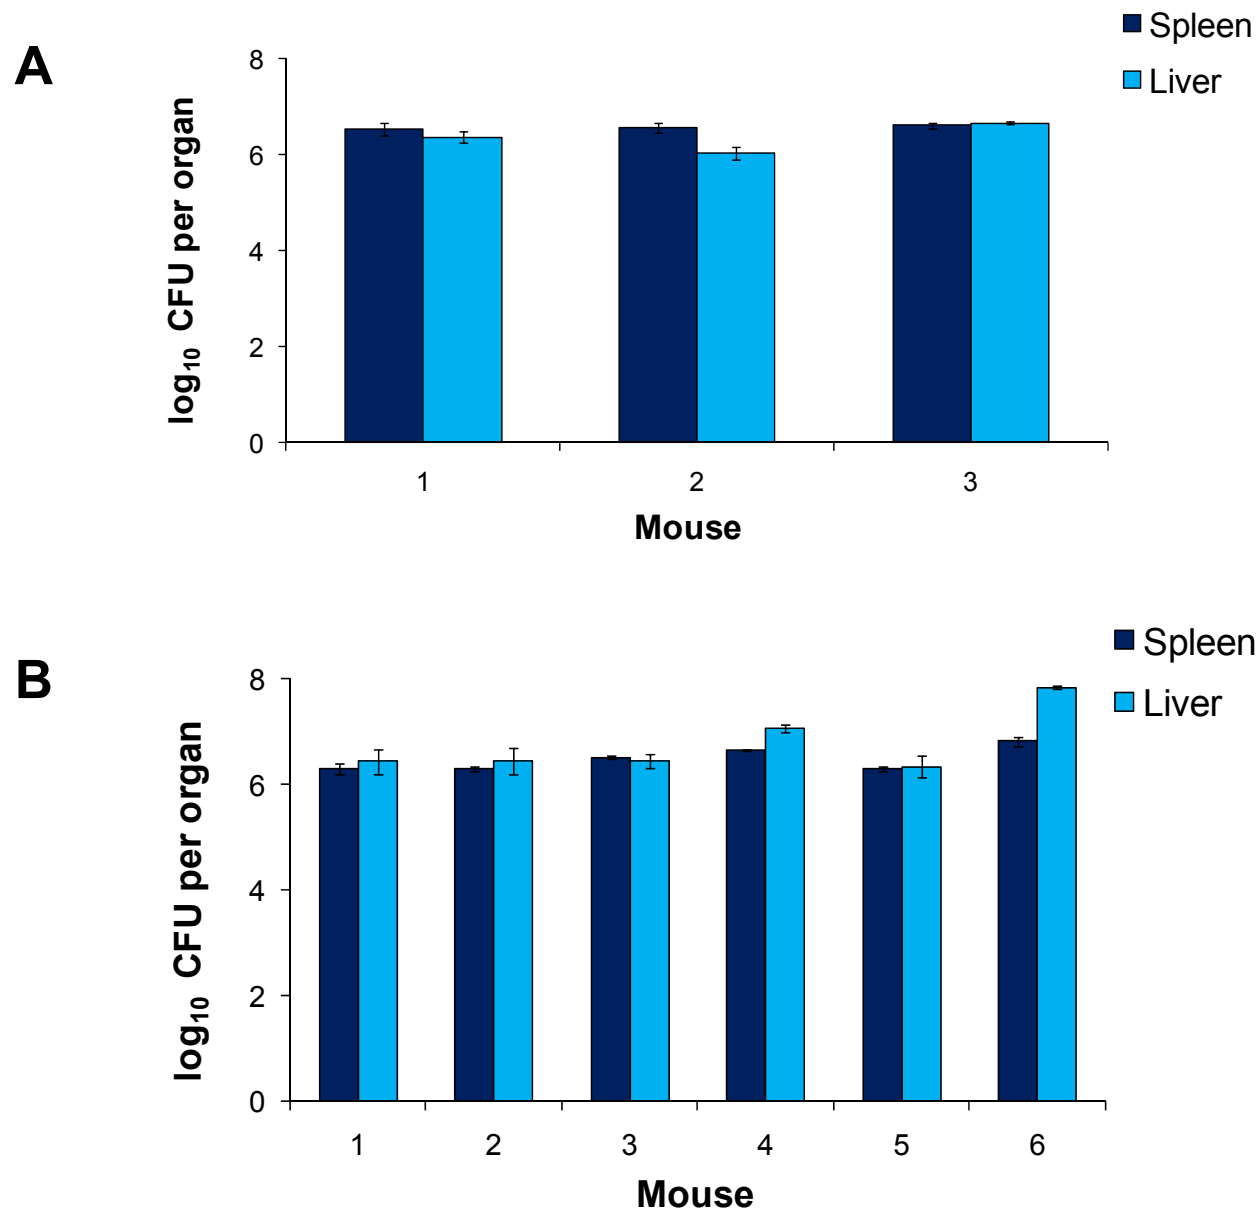

**Figure S1. Colonization dynamics of *S. Enteritidis* PT4 strain P125109 by an IP route of infection in susceptible BALB/c mice.**

**(A)**  $10^6$  CFU of the wild-type strain P125109 were administrated into 3 mice and bacteria were recovered from spleen and liver at two days post infection. **(B)**  $10^6$  CFU of a transposon library made on strain P125109 were administrated into 6 mice and bacteria were recovered from spleen and liver at two days post infection. These bacteria were further used for microarray analyses.
