# Supplementary material
Source: PubMed Central journal article supplement (PMC3264302)
Supplement: supp_80.2.839_IAI5497-11_ST1.pdf [file supp_80.2.839_IAI5497-11_ST1.pdf]

**TABLE S1. Primers used in this study.**

**Transposon mutagenesis and amplification for hybridization**

| <b>Primer</b> | <b>Sequence</b>               |
|---------------|-------------------------------|
| KAN-2(F)      | ATGAGCCATATTCAACGGGAAA        |
| KAN-2(R)      | CGAGCATCAAATGAAACTGCAA        |
| MEKAN2-B      | GGTTGAGATGTGTATAAGAGACAG      |
| CCT24VN       | CCTTTTTTTTTTTTTTTTTTTTTTTTVN  |
| DOPR2         | CAACGCAGACCGTTCCGTGGCA        |
| KAN2FP1-B     | GTCCACCTACAACAAAGCTCTCATCAACC |

**Mutagenesis**

| <b>Primer</b>   | <b>Sequence</b>                                                   |
|-----------------|-------------------------------------------------------------------|
| SEN1001_(H1+P1) | AATTTTACAAATGAATGGAGGGTTGCACATGGTAAATCGCGTGCAGGCTGGAGCTGCTTC      |
| SEN1001_(H2+P2) | CTTGTAACGTTATTTACTCTCATCTGCGACAATGAGAGCCATATGAATATCCTCCTTAG       |
| SEN1001_Out5    | TCTCGATTGCGCATGTAGTC                                              |
| SEN1976_(H2+P2) | ACAGTTAACATTATTGGCATGCATATAATCTTCTGTAATTCATATGAATATCCTCCTTAG      |
| SEN1999_(H1+P1) | TTTTTAGGGAAAAGAATGACAAAAAGATTGCCTGTCGCGGAGATAGTGCAGGCTGGAGCTGCTTC |
| SEN1999_Out5    | TGAACGATCTTCCTGTGCTG                                              |
| SEN1977_(H1+P1) | GGGGCACTTTATGCCCTTTTTGGATCATATTTTCAGATGGTGTAGGCTGGAGCTGCTTC       |
| SEN1977_(H2+P2) | ATTAATAAGTCATTGTGCCTGAACGATATAATTCATGGCCATATGAATATCCTCCTTAG       |
| SEN1977_Out5    | AGCGCAAGCGGAAAGTAATA                                              |

|                  |                                                                    |
|------------------|--------------------------------------------------------------------|
| SEN2145B_(H1+P1) | GGAAGAGATTATGAAACGTTCACTTATTGCTGCTTCTGTAGTGCAGGCTGGAGCTGCTTC       |
| SEN2144A_(H2+P2) | TACCGCATAAATTTAATTATAAGATACCACGATTAATGCTTTTCGACATATGAATATCCTCCTTAG |
| SEN2145B_Out5    | GGTGATAGCACCCGACAGAT                                               |
| SEN4292_(H1+P1)  | ATATATAGGTGTAATATGGCAATCATTATTTCCACCGTAAGTAGCGTGCAGGCTGGAGCTGCTTC  |
| SEN4290_(H2+P2)  | TCATATAACATTATAAATTC AACGAGGTGAGTTTTGTGCTGCATATGAATATCCTCCTTAG     |
| SEN4292_Out5     | AACACCAGTACCGCATCCTC                                               |
| K1               | CAGTCATAGCCGAATAGCCT                                               |
| C3               | CAGCTGAACGGTCTGGTTATAGG                                            |

### Cloning of *SEN1001*

| Primer             | Sequence                       |
|--------------------|--------------------------------|
| SEN1001_Out3_BamHI | CGGGATCCCGTTATTTACTCTCATCTGCGA |
| SEN1001_Out5_BamHI | CGGGATCCTCCTTTACTGGGAAAAGCAA   |
| NFB9-MCS_Out5      | CGGGCCTCTTCGCTATTACG           |
| NFB9-MCS_Out3      | GGCACCCCAGGCTTTACACT           |
| LepA_F             | CGTAATCATGGTCATAGCTGTTTCC      |
| LepA_R             | ACTTCAAGATCCATTTCCATCG         |
| T7                 | TAATACGACTCACTATAGGG           |
| SP6                | ATTTAGGTGACACTATAGAA           |

Underlined text indicates the region that anneals to the 5' or 3' end of the antibiotic resistance cassette used for the mutagenesis.
