# Supplementary material
Source: PubMed Central journal article supplement (PMC3264302)

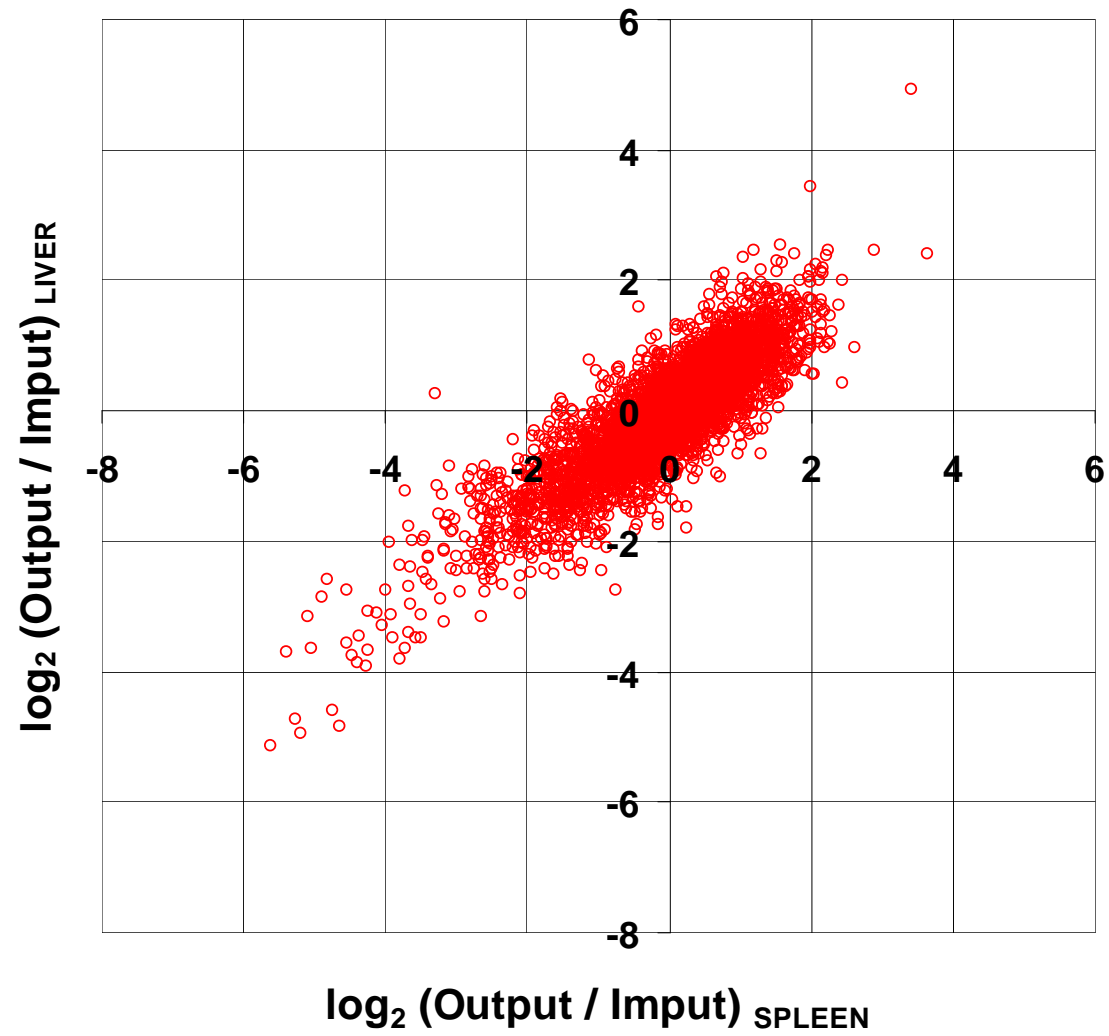

Figure S2. Correlation between data obtained from liver and spleen samples.

Supplement: supp_80.2.839_IAI5497-11_SF2.pdf [file supp_80.2.839_IAI5497-11_SF2.pdf]
